# Supplementary material for: Non-stoichiometric magnetite as catalyst for the photocatalytic degradation of phenol and 2,6-dibromo-4-methylphenol – a new approach in water treatment
Source: publisher site journal article supplement (doi:10.3762/bjnano.13.126), 2022-12-15
Supplement: Additional file 1 [file 2190-4286-13-126-S1.pdf]

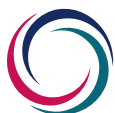

## Supporting Information

for

### **Non-stoichiometric magnetite as catalyst for the photocatalytic degradation of phenol and 2,6-dibromo-4-methylphenol – a new approach in water treatment**

Joanna Kisała, Anna Tomaszewska and Przemysław Kolek

*Beilstein J. Nanotechnol.* **2022**, *13*, 1531–1540. [doi:10.3762/bjnano.13.126](https://doi.org/10.3762/bjnano.13.126)

## Supplementary information

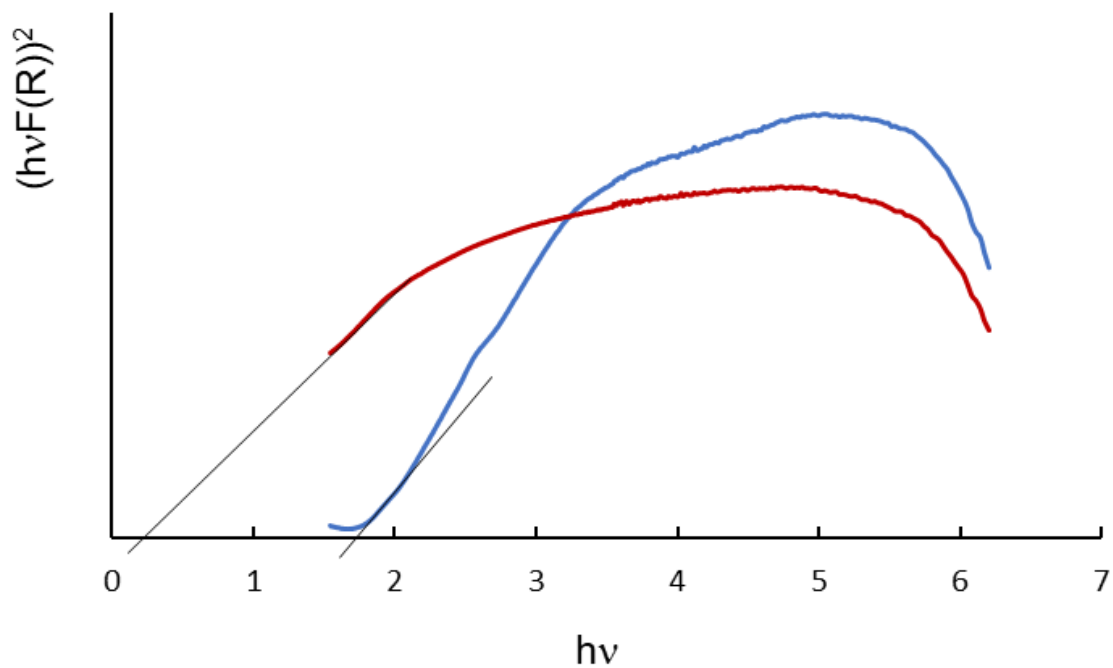

**Figure S1:** Kubelka–Munk plots of M1 (red) and M2 (blue).

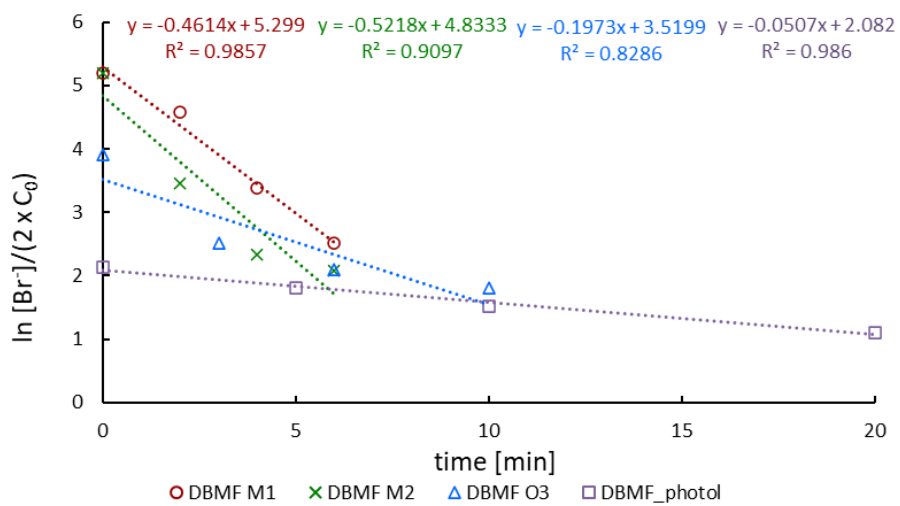

**Figure S2:** Establishing the apparent rate constant for bromide generation.

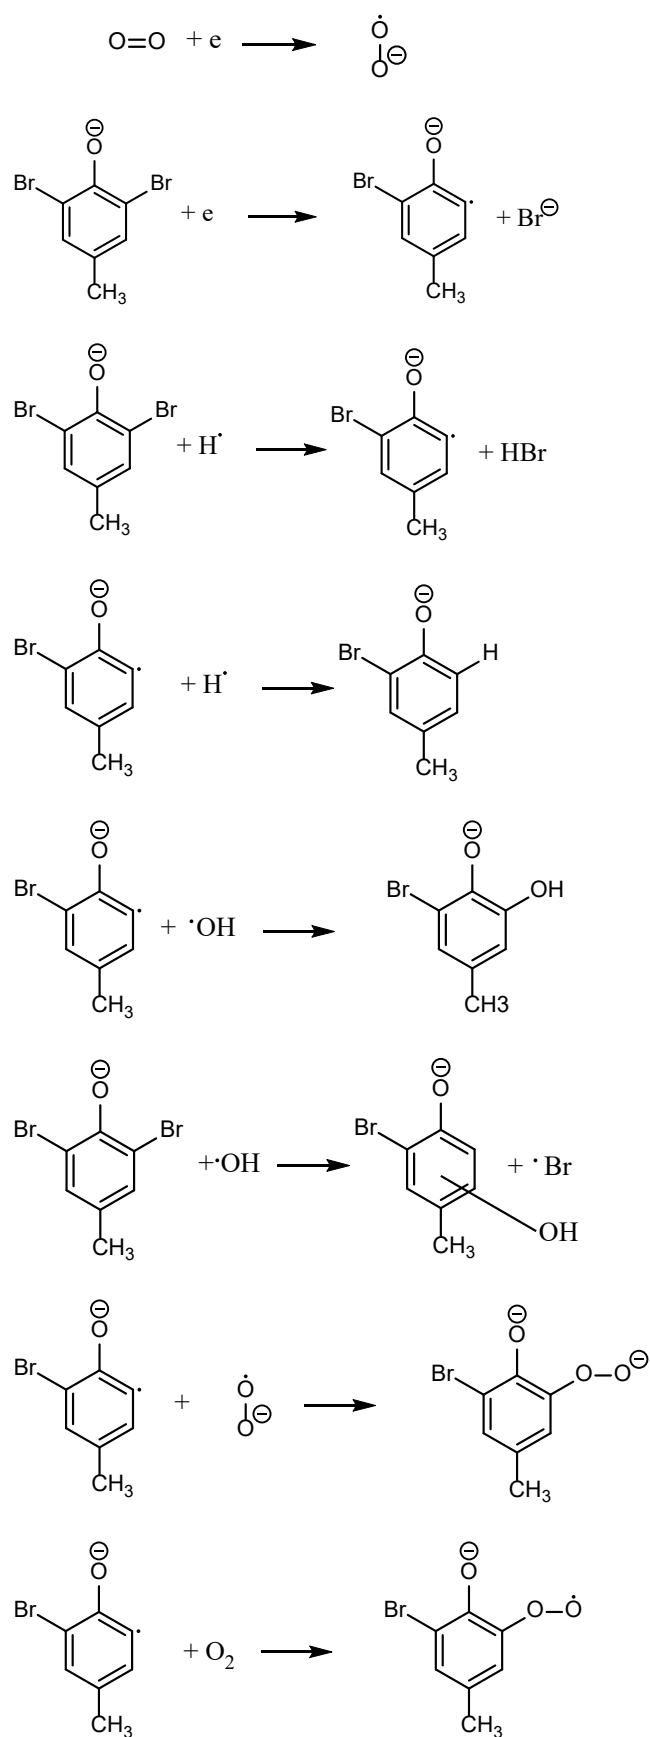

**Figure S3:** DBMP reactions with reactive species generated during photocatalysis.
